# Supplementary material
Source: PubMed Central journal article supplement (PMC2612214)
Supplement: supp_75_1_234__1.pdf [file supp_75_1_234__1.pdf]

1 **Supplement method:**

2

3 **Total cell enumeration in groundwater.**

4 One hundred microlitres of groundwater was diluted 1:10 and fixed with 1% (wt:vol)  
5 paraformaldehyde solution at 4 °C. Subsequently, cells were stained with a 1 in  
6 10,000 dilution of SYBR Green I stock solution (Molecular Probes Co. USA) at room  
7 temperature in the dark for 2 hours. Subsequently, triplicate cell concentrations were  
8 determined for each sample using pre- and post weighed aspirations and side scatter  
9 versus green fluorescence detection on a FACSCalibur flow cytometer (Becton  
10 Dickinson Inc., USA). To account for machine drift, 0.47 µm Flowcheck  
11 microspheres (Polysciences Inc, USA) were added to each sample as an internal  
12 fluorescence calibration.

13

14 **Isolation of naphthalene degraders and conjugation experiments**

15 Naphthalene degraders were isolated by spreading 100 µl of groundwater onto  
16 minimal medium agar plates (3) with naphthalene crystals on the lid, which served as  
17 the sole carbon source. The plates were incubated at 14 °C for 1 week. As bacteria  
18 grew and formed colonies, each colony was taken and transferred to a new plate.  
19 Each purified bacterial colony was identified by sequencing PCR-amplified 16S  
20 rDNA using primers 63F and 1387R (Table 2).

21

22 The conjugative matings were performed with a plasmid-free recipient *P. putida*  
23 UWC1 and each of the Pseudomonad isolates obtained. *P. putida* UWC1 (Rif<sup>r</sup>, a gift  
24 from Dr Andrew Lilly, CEH-Oxford) harbours rifampicin resistant gene within its  
25 chromosome, but cannot utilize naphthalene as a sole source of carbon. Conversely,  
26 the Pseudomonad isolates were capable of growth on minimal medium with

27 naphthalene as a sole carbon source, but were not resistant to 100 µg/ml rifampicin. *P.*  
28 *putida* NCIB 9816 (1, 2) (a gift from Peter Williams group at University of Wales,  
29 Bangor), that harbours pDTG1 (pWW60), was used as a positive control for  
30 subsequent plasmid conjugation experiments. In the conjugation experiments, *P.*  
31 *putida* UWC1 was used as a plasmid recipient and the Pseudomonad isolates as well  
32 as *P. putida* NCIB 9816 were used as plasmid donor. Overnight broth cultures of 3  
33 naphthalene degradation isolates, the positive control *P. putida* NCIB9816 and  
34 plasmid-free recipient *P. putida* UWC1 were washed three times in PBS and each  
35 donor mixed with the *P. putida* UWC1 recipient (200 µl each). Each mating mixture  
36 was spotted onto the surface of a cellulose nitrate membrane filter (25 mm diameter,  
37 0.2 µm pore size, Millipore Inc.), and the filters with bacteria side up, were mounted  
38 on Luria-Bertani agar (LBA) plate and incubated at 28 °C for 24 h. Subsequently, the  
39 mating mixtures were re-suspended from the filters by vortex-mixing in 10 ml of PBS,  
40 diluted and plated onto minimal medium agar plates, supplemented with 100 µg/ml  
41 rifampicin and naphthalene as a sole carbon source. Plates were incubated at 28 °C  
42 for 48 hrs and *P. putida* UWC1 conjugants were selected due to acquired naphthalene  
43 degradation phenotype and rifampicin resistance.

44

#### 45 **Plasmid extraction and characterisation**

46 Naphthalene degrading plasmids transferred to recipient *P. putida* UWC1 through  
47 mating experiments with natural Pseudomonad isolates were extracted with  
48 Nucleplex BAC DNA kit (Tepnel Co., Manchester, UK) employing a bench-top  
49 Nucleplex BAC Automated DNA Purification System (Nucleplex, T1000, Tepnel  
50 Co., Manchester, UK). For genotypic fingerprinting and plasmid homology

51 assessment, the extracted plasmids were initially digested with EcoRI and run on a  
52 1% agarose gel.

53

54 Plasmids originating from *P. putida* WH1 and WH3 were used as templates to  
55 amplify DNA fragments encoding of salicylate hydroxylase (*nahG*) and  
56 transcriptional regulator (*nahR*). The primers employed for amplification of *nahG*  
57 were NahG1\_F and NahG1\_R, and for amplification of *nahR* were NahR1\_for and  
58 NahR\_end\_R (Table 2), respectively. A proteomics approach was used to identify  
59 functional protein and genes of plasmids in *P. fluorescens* WH2 and it is reported in  
60 another paper (5).

61

#### 62 **Denaturing gradient gel electrophoresis (DGGE) and sequencing**

63 The GC-clamped PCR products were loaded onto a 10% (wt/vol) polyacrylamide gels,  
64 with a 35 to 70% urea/formamide denaturing gradient, as previously described (4).

65 Denaturing gradient gels were cast and run using the Ingeny PhorU2 system at 60°C  
66 and 100 V for 16 h. Gels were stained with SYBR gold nucleic acid gel stain  
67 (Molecular Probes) and visualized by a Versa-Doc Imaging System (Model 3000,  
68 BioRad Laboratories, Herts., UK). The bands of interest were cut from gels and  
69 eluted in water at 4 °C overnight. The recovered DNA was re-amplified with primers  
70 338F and 530R, as previously described (Table 2). The re-amplified products were  
71 cloned into pGEM-T as per manufacturer's instructions (Promega Co, USA) and  
72 transferred to competent cells of *E. Coli* JM109. To verify recovery of the bands of  
73 interest, sixteen colonies were randomly selected for PCR with primers GC338F/  
74 530R, and compared to expected bands by DGGE.

75

76 **Monitoring naphthalene biodegradation.**

77 *HPLC analysis.* HPLC was used to measure naphthalene and DMF (solvent)  
78 concentrations, at different time points, using a method previously described (3). The  
79 cells were removed by passing through 0.22 µm Minisart Syringe End Filters  
80 (Sartorius Ltd, UK). Cell-free samples were analyzed on a Dionex liquid  
81 chromatography (Dionex Ltd, Camberley, UK), equipped with a photo diode array  
82 detector, with a Phenomenex C18 column (250 mm × 3.25 mm, particle diameter 5  
83 mm). Appropriate standards for naphthalene and DMF-specific calibration were  
84 prepared in acetonitrile and quantified at 220 nm. An isocratic program was applied  
85 with a mobile phase containing 75% acetonitrile, yielding a retention time of 2.75 and  
86 7.12 for DMF and naphthalene, respectively.

87

88 *Biosensor analysis.* A salicylic acid (SA) biosensor was used to monitor the SA  
89 concentration during naphthalene biodegradation process, as previously described (3),.  
90 Briefly, 100 µl of sample was removed from controls and naphthalene amended  
91 treatments at each time point (0, 19, 21, 23, 29, 36, 44, 46, 48, 53, 64, 66 and 69 hrs),  
92 and was added to 100 µl overnight culture of *Acinetobacter sp.* ADPWH\_lux SA  
93 biosensor (3). The SA level was determined by comparing bioluminescence  
94 expression from each sample (3).

95

96

97 **Reference**

- 98 1. **Cane, P. A., and P. A. Williams.** 1982. The Plasmid-Coded Metabolism of  
99 Naphthalene and 2- Methyl-naphthalene in Pseudomonas Strains - Phenotypic  
100 Changes Correlated With Structural Modification of the Plasmid Pww60-1.  
101 Journal of General Microbiology **128**:2281-2290.
- 102 2. **Cane, P. A., and P. A. Williams.** 1986. A Restriction Map of Naphthalene  
103 Catabolic Plasmid Pww60-1 and the Location of Some of Its Catabolic Genes.  
104 Journal of General Microbiology **132**:2919-2929.
- 105 3. **Huang, W. E., H. Wang, L. F. Huang, H. J. Zheng, A. C. Singer, I. P.  
106 Thompson, and A. S. Whiteley.** 2005. Chromosomally Located Gene  
107 Fusions Constructed in Acinetobacter sp. ADP1 for the Environmental  
108 Detection of Salicylate. Environmental Microbiology **7**:1339-1348.
- 109 4. **Manfield, M., A. S. Whiteley, R. I. Griffiths, and M. J. Bailey.** 2002. RNA  
110 stable isotope probing, a novel means of linking microbial community  
111 function to Phylogeny. Applied and Environmental Microbiology **68**:5367-  
112 5373.
- 113 5. **Yu, X. H., W. E. Huang, and A. S. Whiteley.** 2008. Investigation of  
114 naphthalene biodegradation pathway in Pseudomonas fluorescens using a  
115 proteomic approach. Environmental Microbiology **in preparation.**  
116  
117

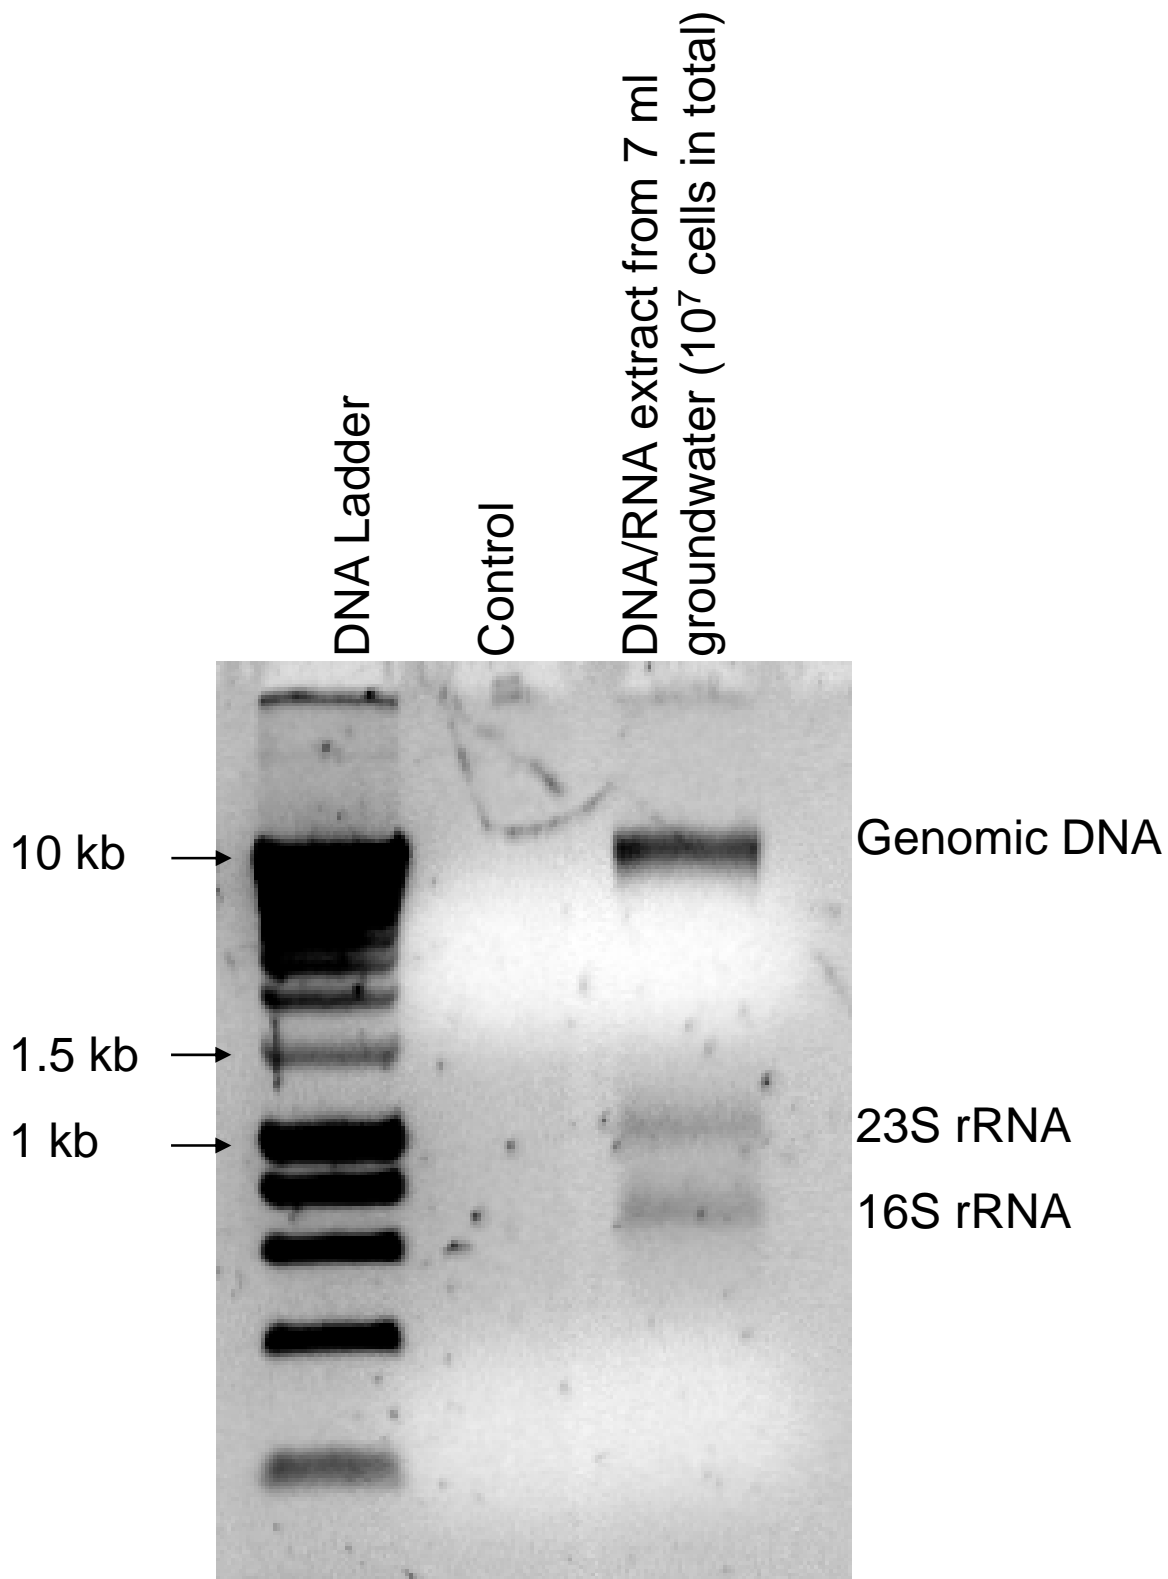

**Figure S1.** DNA/RNA extraction from groundwater. Both genomic DNA and 16S rRNA from 7 ml groundwater ( $1.5 \times 10^6$  cells/ml) was efficiently extracted.

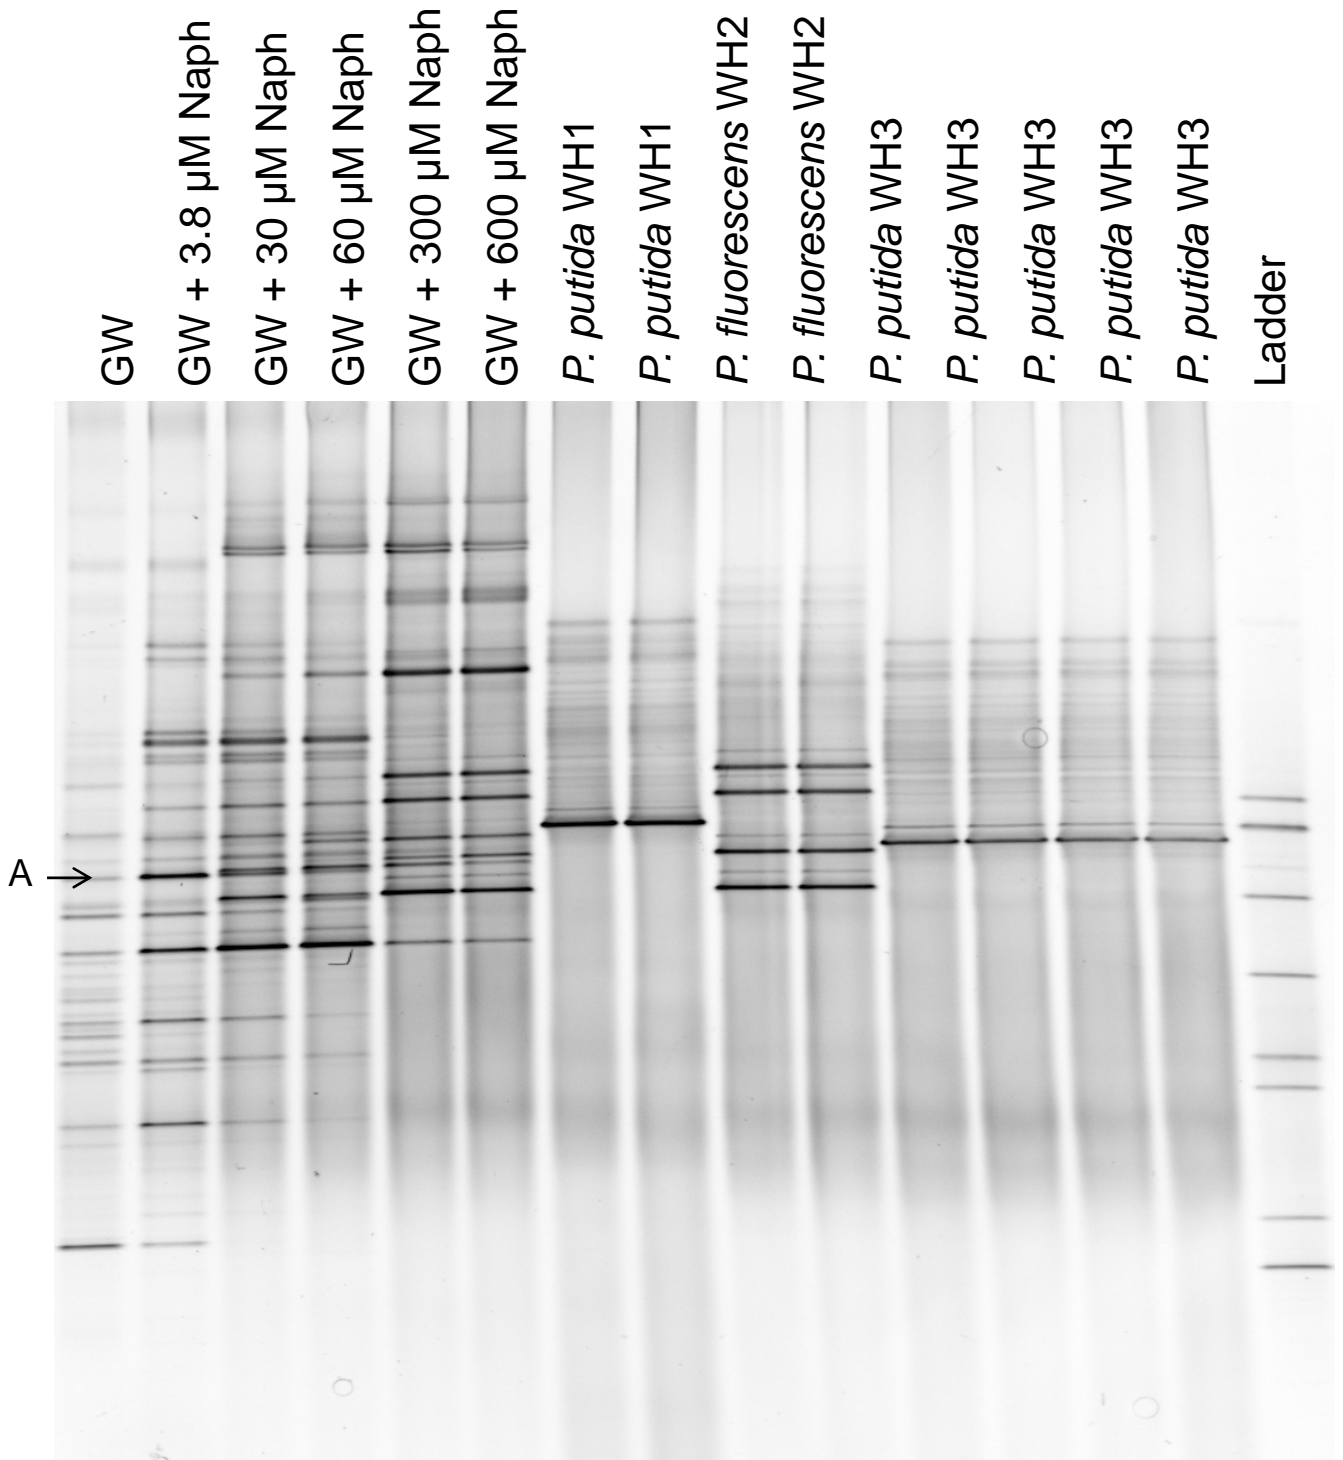

**Figure S2.** Naphthalene concentrations affected the groundwater microbial communities. With increasing naphthalene concentrations, microbial biodiversity decreased and *Pseudomonas fluorescens* WH2 gradually became dominant species in the communities. Band A was identified as *Acidovorax* sp..

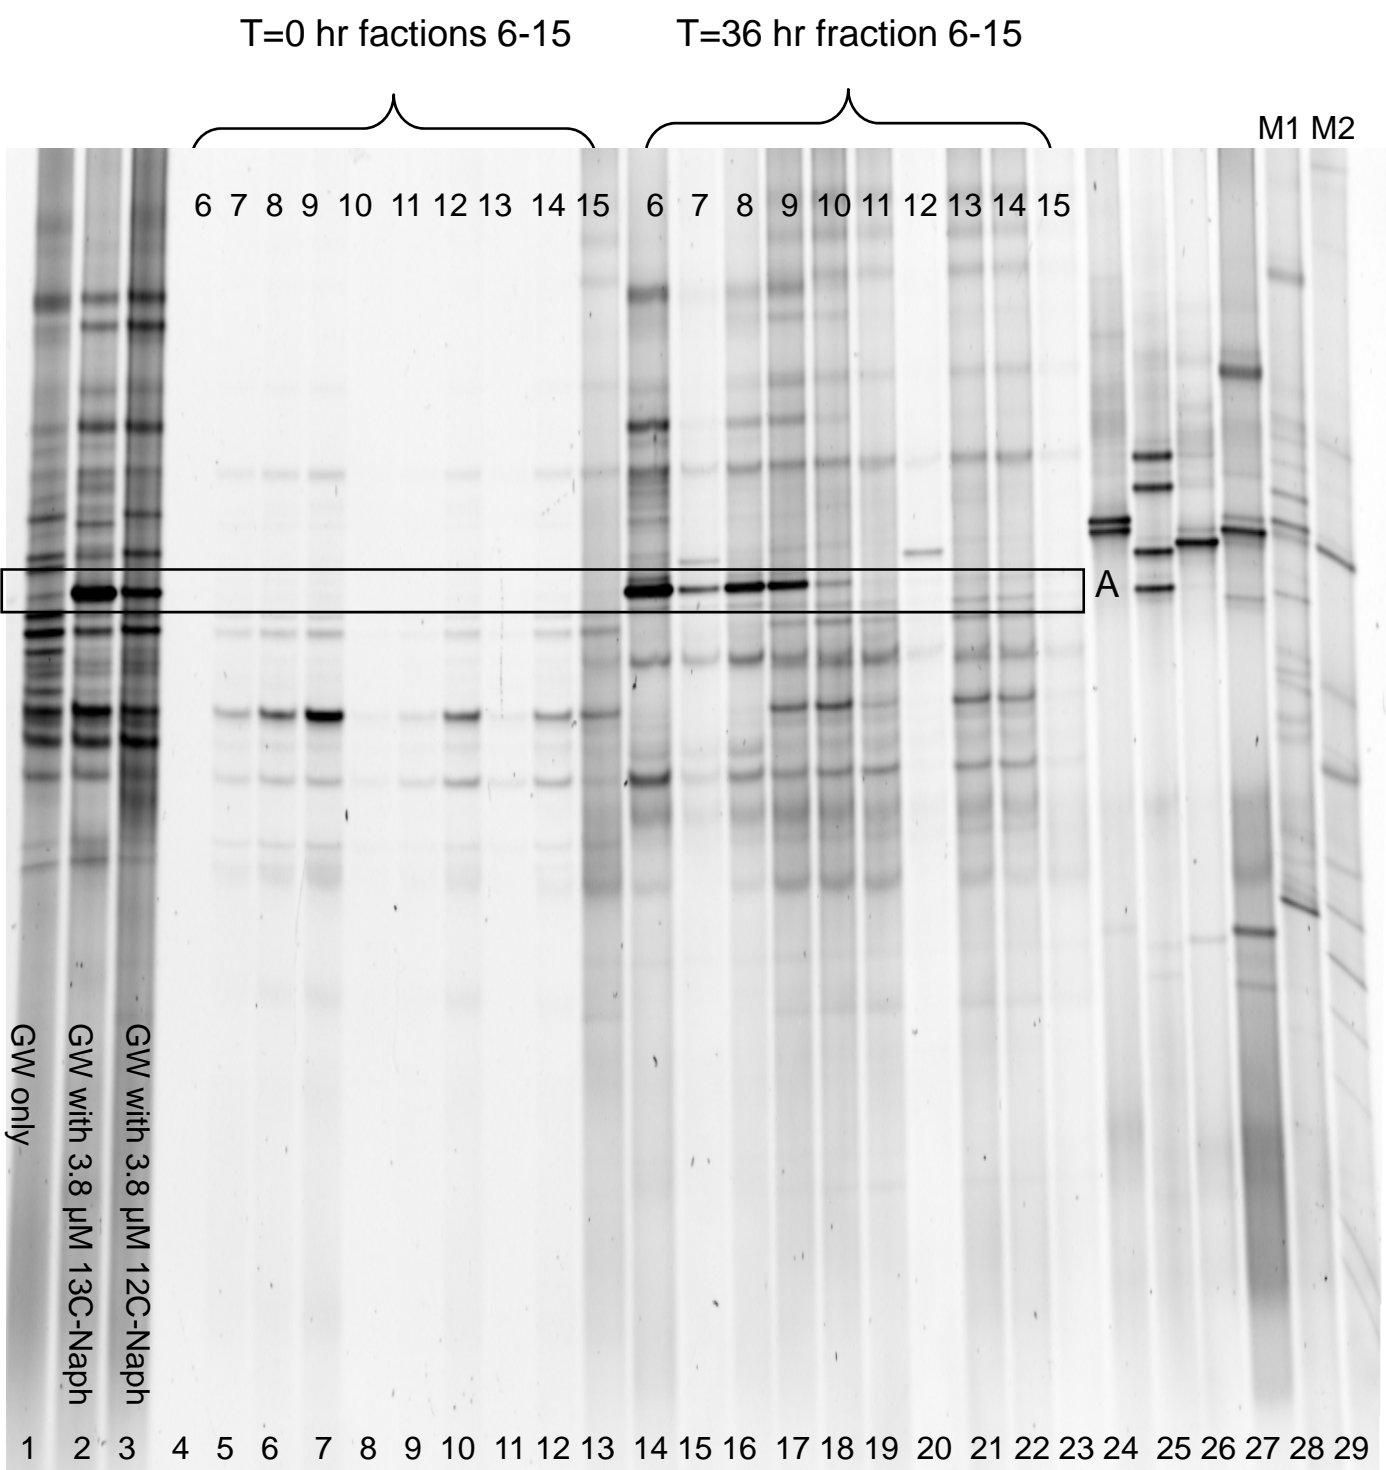

**Figure S3.** Microbial community profile relating to degradation species. Lane 1-3 represents groundwater only, groundwater pulsed with 3.8 μM 12C- and 13C-naphthalene at 36 hrs. Lane 4-13 and lane 14-23 respectively represents RNA fractions 6-15 from equilibrium density gradients at 0 hr and 36 hrs after 13C-naphthalene pulse. Lane 24-26 represents 3 pure cultures isolated from groundwater. Lane 27-29 are unrelated DGGE markers. It suggests that the *in-situ* naphthalene degrader was not species which were isolated from groundwater. Band A was identified as *Acidovorax sp.*



0 25 36 46 53 72

M1 M2

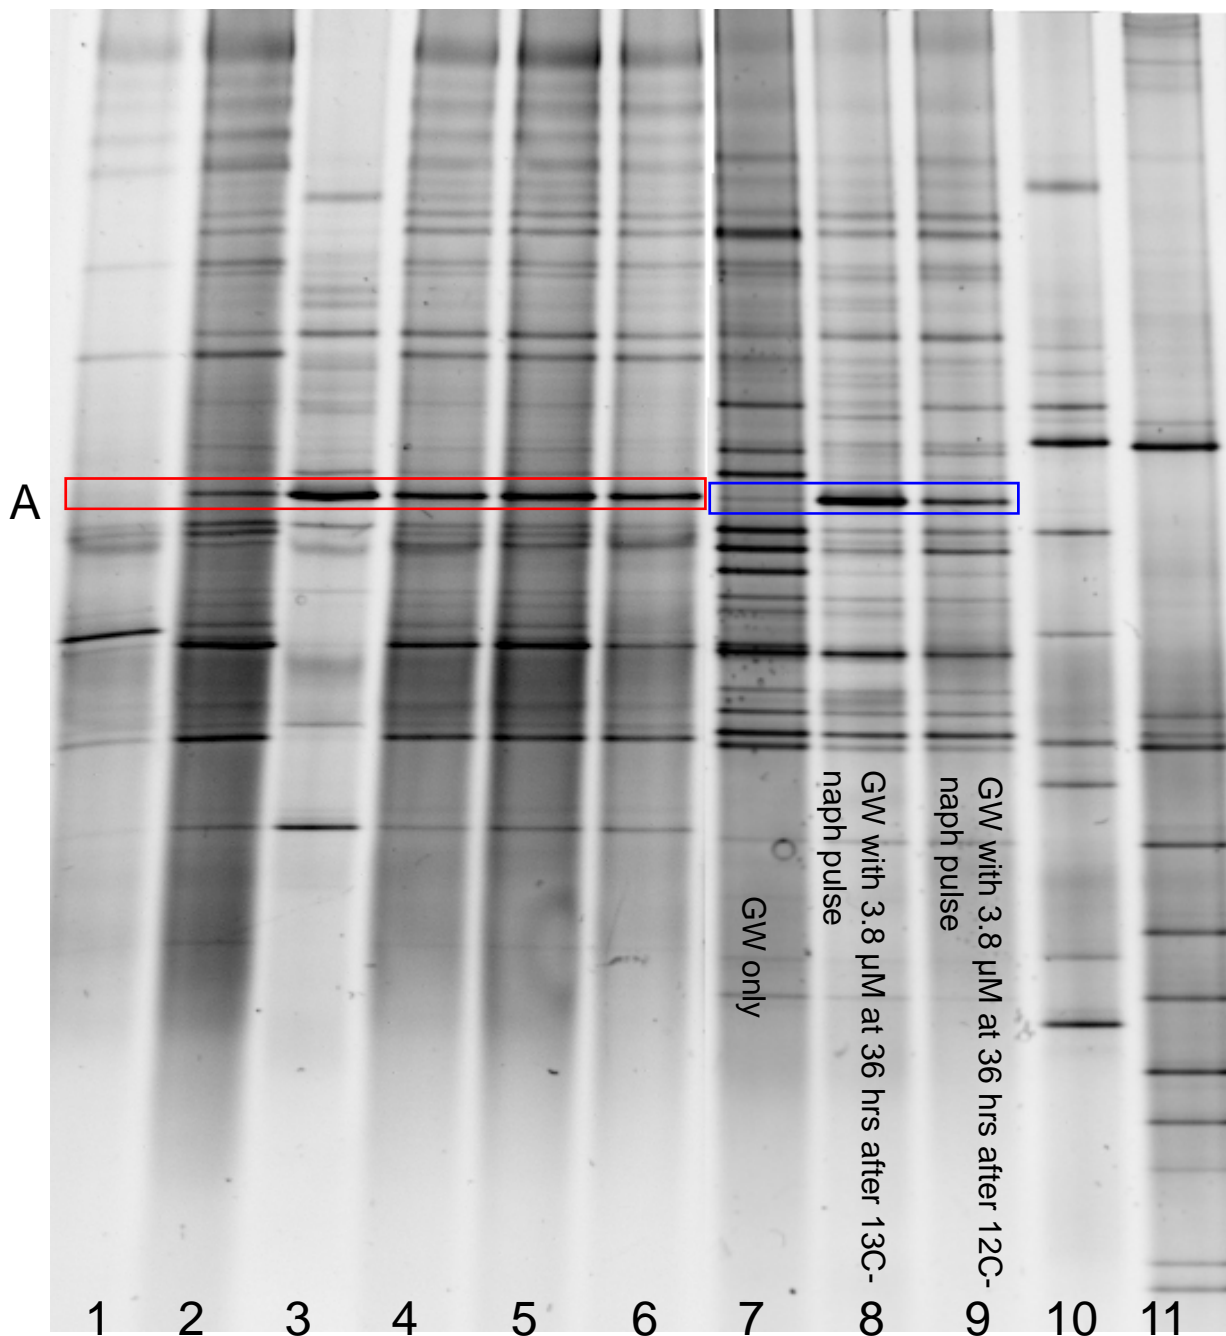

**Figure S4.** DGGE profile of microbial communities present in fractions 6 ( $^{13}\text{C}$ -RNA) from equilibrium density gradients at 0-72 hrs after the  $^{13}\text{C}$ -naphthalene pulse. Lane 1-6 represents 0, 25, 36, 48, 53 and 72 hrs respectively, lane 7-9 represents groundwater only, groundwater pulsed with 3.8  $\mu\text{M}$   $^{12}\text{C}$ - and  $^{13}\text{C}$ -naphthalene at 36 hrs. Lane 10-11 represents unrelated DGGE marker1 and marker2. The profile suggested that a particular community member (highlighted bands), appeared in  $^{13}\text{C}$ -RNA fraction, was a primer naphthalene degrader *in-situ*. Cut-band A sequence indicated that it was *Acidovorax sp.*.

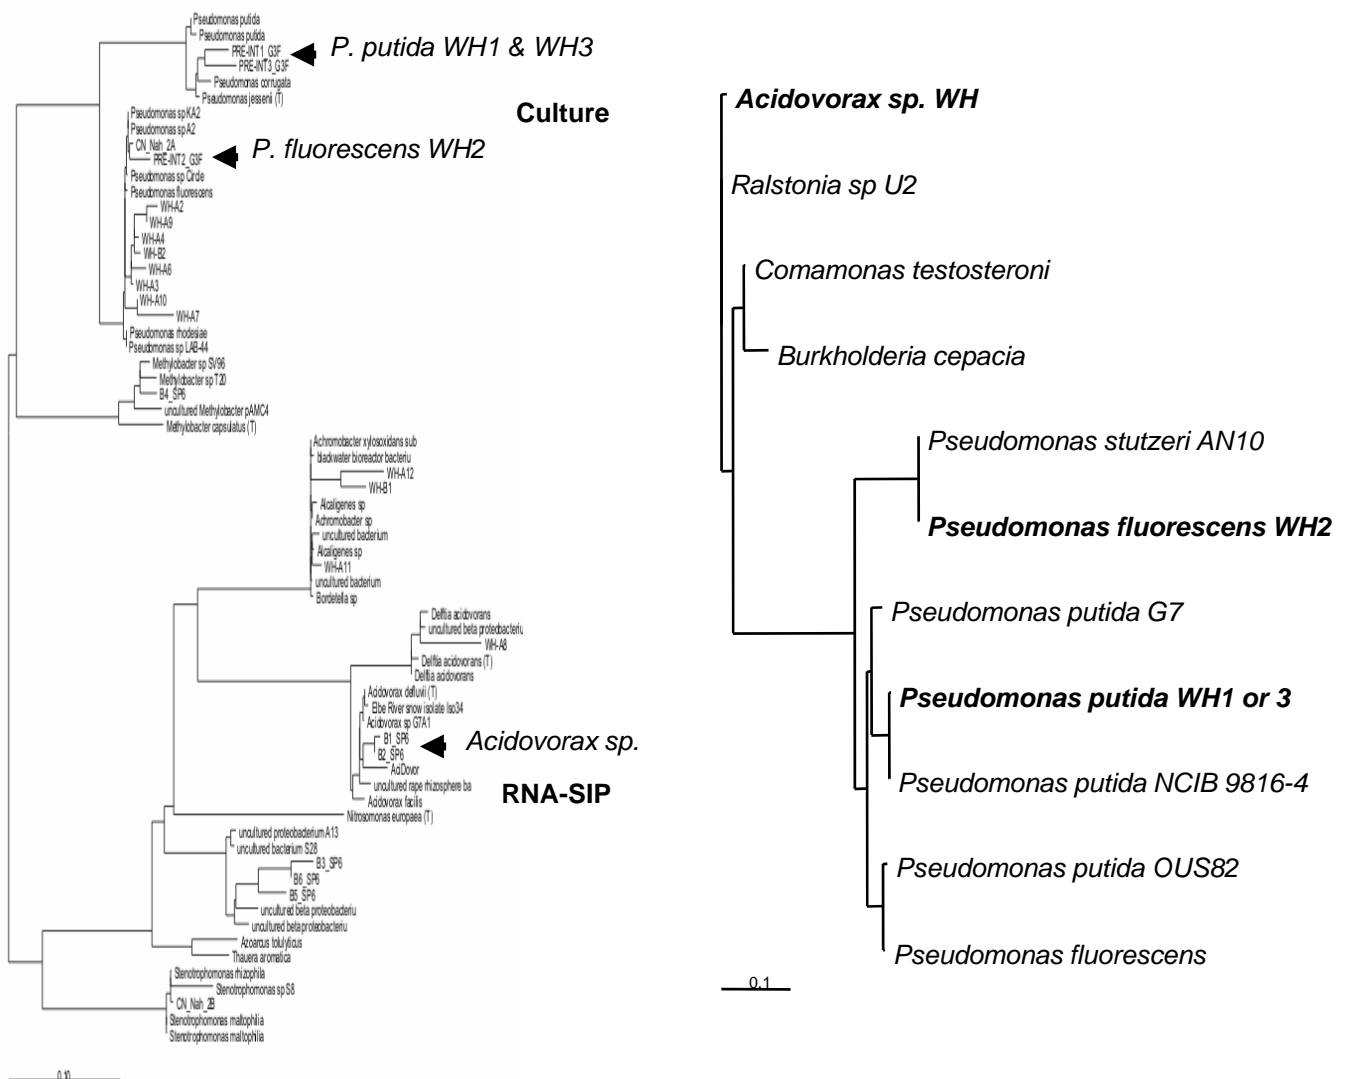

**Figure S5.** (A) 16S rRNA based sequence diversity of naphthalene degraders isolated from the soil and groundwater of the contaminated site and comparison to those sequences recovered by RNA-SIP. The sequences of 16S rRNA indicates that strains WH1, 2 and 3 were closely related to *Pseudomonas spp.* and sequences recovered from RNA-SIP were related to *Acidovorax sp.*. (B) Phylogenetic analysis of naphthalene dioxygenase gene (NDO) gene sequences recovered from groundwater communities relating to the *Acidovorax sp.* and three *Pseudomonad* isolates.

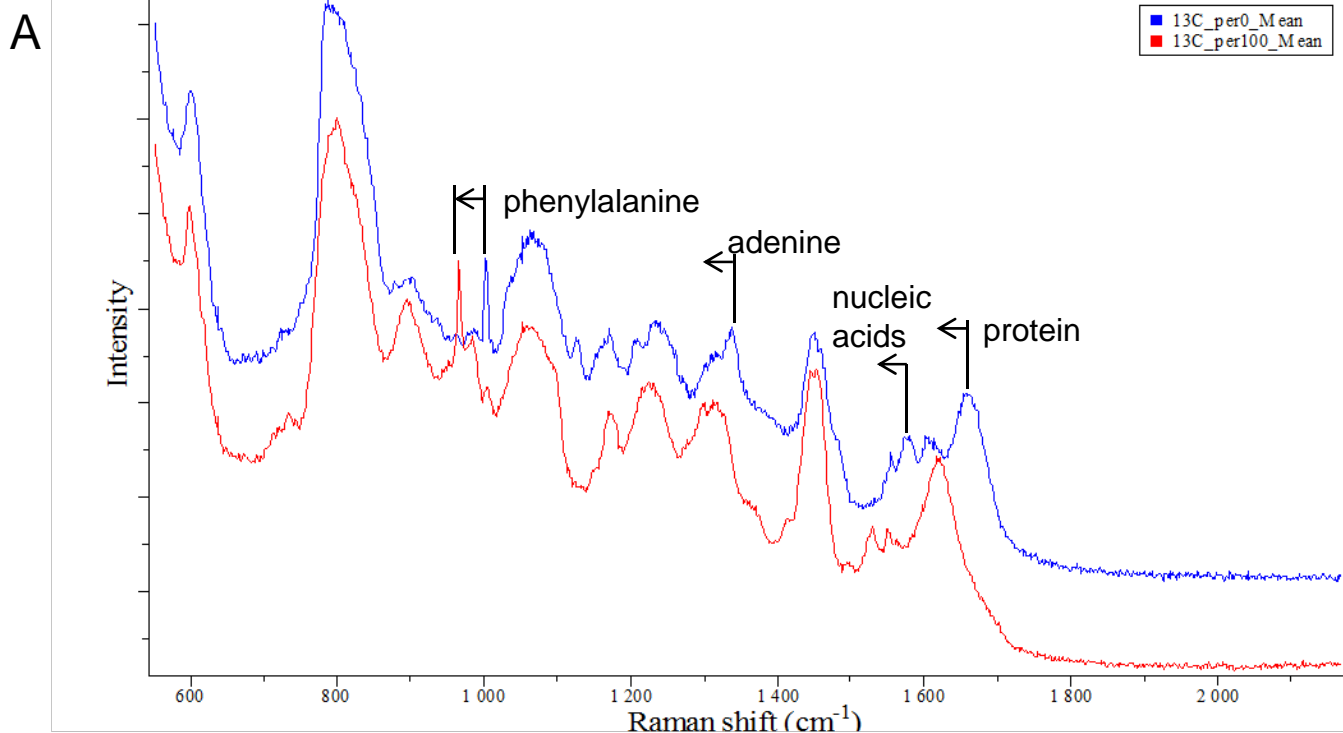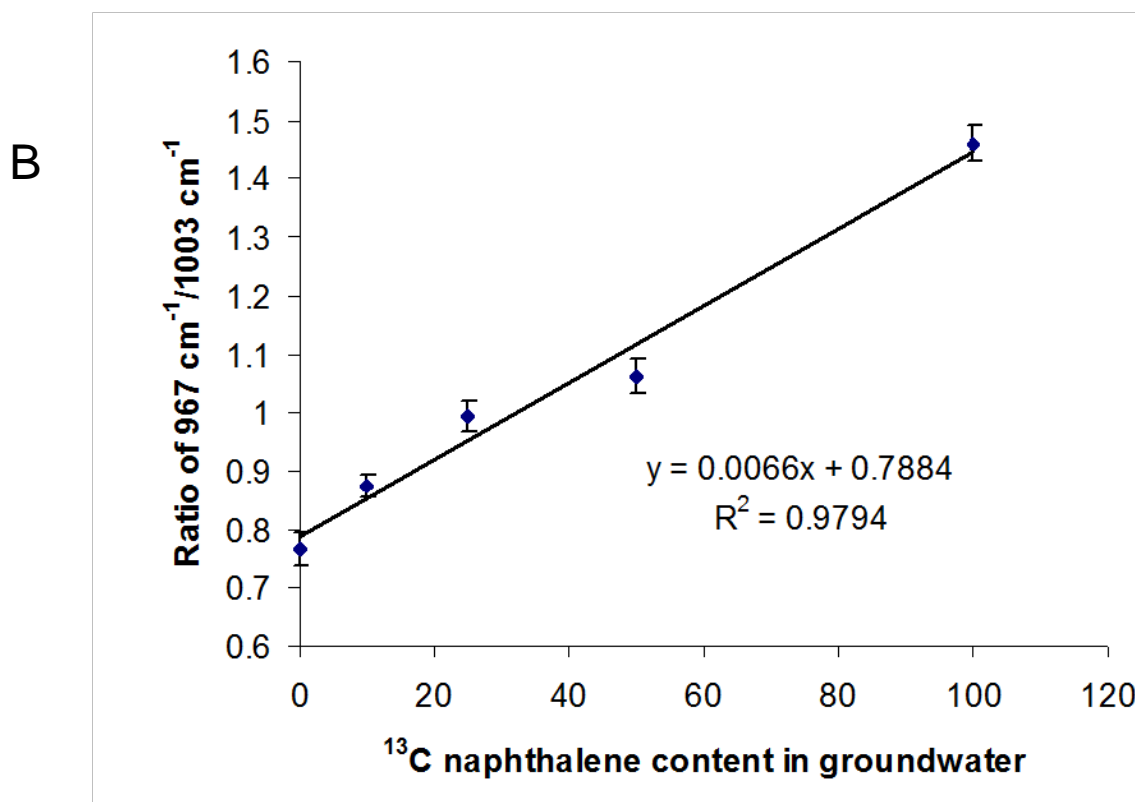

**Figure S6.** Some bands of Raman spectra of individual bacteria shifted as they integrated  $^{13}\text{C}$ -naphthalene into the cells. (A) Raman spectra obtained for living cells of *P. fluorescens* WH2 grown in minimal media containing either  $^{12}\text{C}$  or  $^{13}\text{C}$  labelled naphthalene as the sole source of carbon. (B) Relationship between  $^{13}\text{C}$ -naphthalene content and 'red' shift ratios of individual bacteria (RSR; calculated as intensity at  $967 \text{ cm}^{-1}$  / intensity at  $1003 \text{ cm}^{-1}$ ) when analyzed under five  $^{13}\text{C}$  labeling conditions ( $n = 5-10$  cells for each point).
